# Supplementary material for: In-depth analysis of subclass-specific conformational preferences of IgG antibodies
Source: PubMed Central journal article supplement (PMC4285876; doi:10.1107/s205225251402209x), 2015-01-01
Supplement: m-02-00009-sup1.pdf [file m-02-00009-sup1.pdf]

# IUCrJ

**Volume 2 (2015)**

**Supporting information for article:**

**In-depth analysis of subclass-specific conformational preferences of IgG antibodies**

**Xinsheng Tian, Bente Vestergaard, Matthias Thorolfsson, Zhiru Yang, Hanne B. Rasmussen and Annette E. Langkilde**

## Supporting information

### In-depth analysis of subclass-specific conformational preferences of IgG antibodies

XINSHENG TIAN<sup>a</sup>, BENTE VESTERGAARD<sup>a</sup>, MATTHIAS THOROLFSSON<sup>b</sup>, ZHIRU YANG<sup>c</sup>, HANNE B. RASMUSSEN<sup>b</sup>, ANNETTE E. LANGKILDE<sup>a</sup>

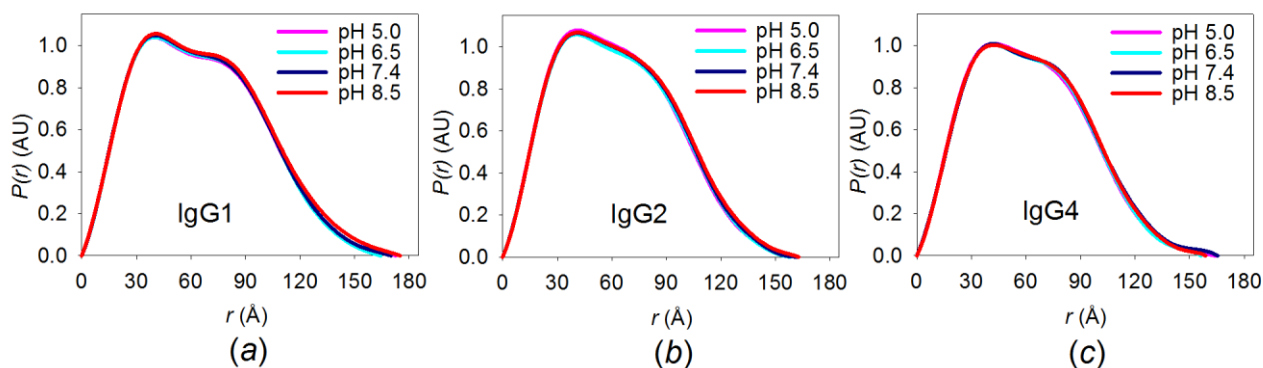

**Figure S1.** The pair distance distribution functions from the indirect Fourier transformation of the scattering intensity. The SAXS data were collected at pH 3.3, pH 5.0, pH 6.5, pH 7.4, and pH 8.5 as published (Tian *et al.*, 2014).

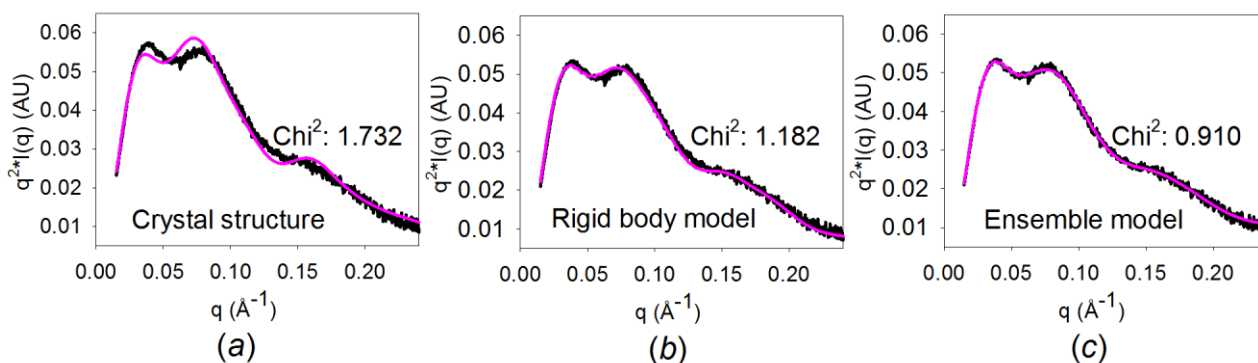

**Figure S2.** Comparison of the Kratky plots between experimental (blue) and theoretical (pink) SAXS curves of IgG1: (a) Crystal structure (PDB entry 1HZH). (b) Rigid body model generated using CORAL. (c) Ensemble model generated using EOM.

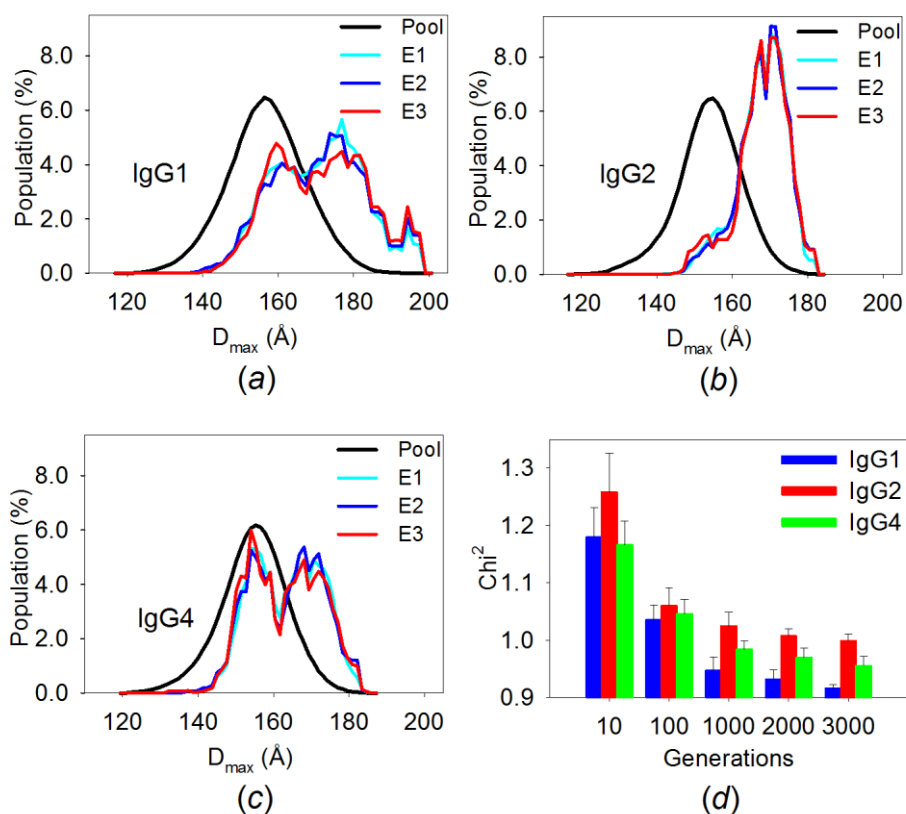

**Figure S3.** (a-c) Consistency of the  $D_{\max}$  distribution with different GAJOE parameters. The black line indicates the  $D_{\max}$  distribution of the conformers in the pool and the colored lines indicate the distribution profiles calculated by GAJOE with 1000 (E1), 2000 (E2) and 3000 (E3) generations, respectively. (d) The correlation between  $\chi^2$  values and generations. Each of the  $\chi^2$  value was averaged from 10 optimized ensembles with the same setting of genetic algorithm.

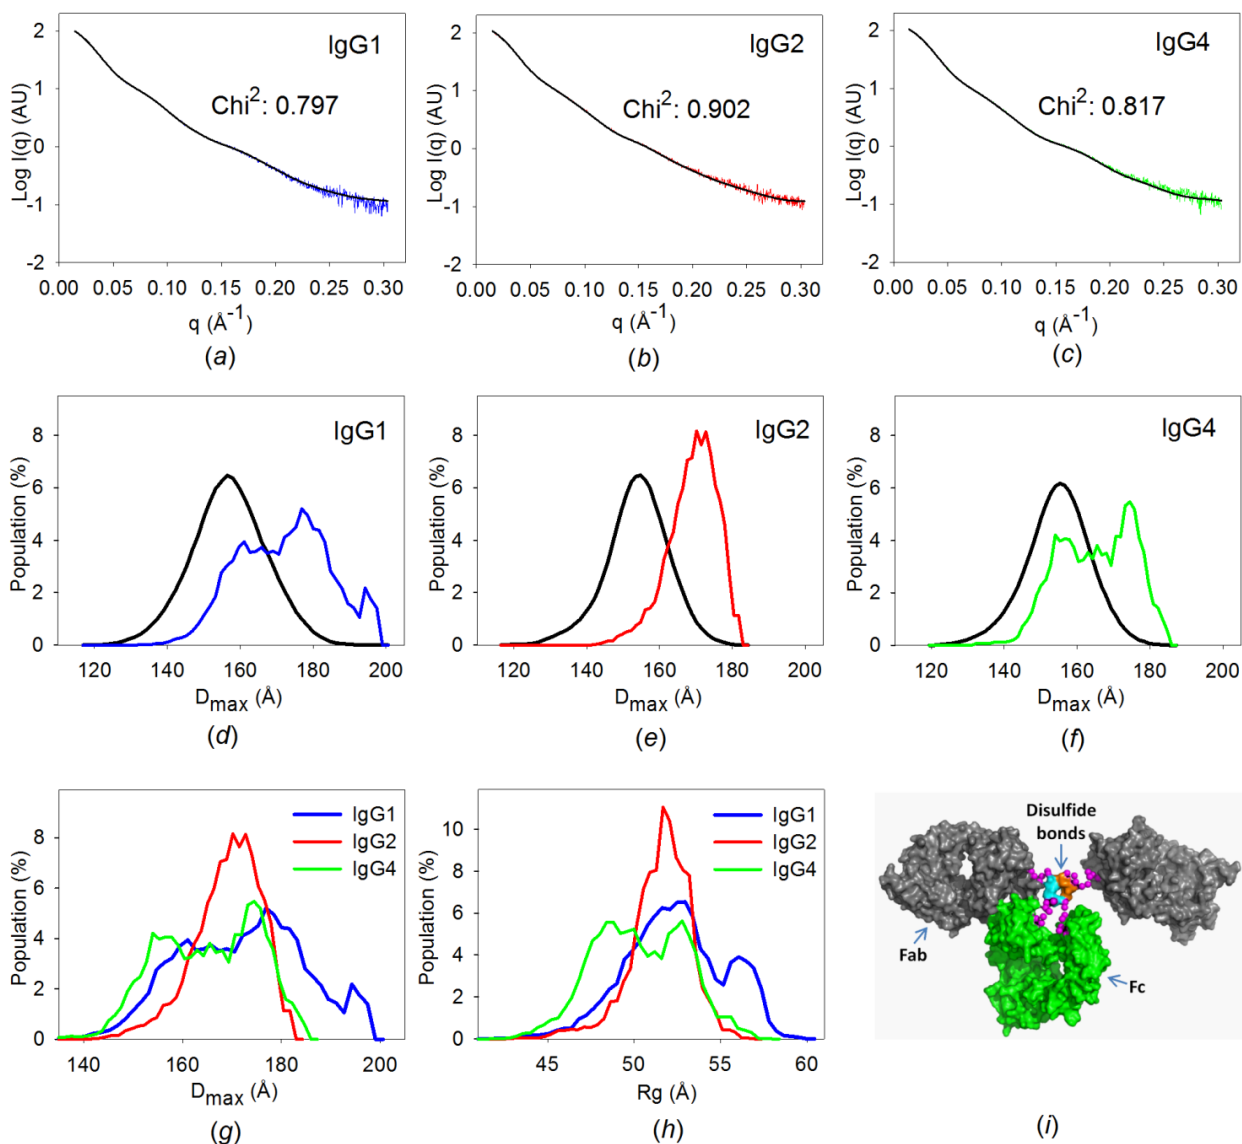

**Figure S4.** Results of ensemble optimization with shorter angular range ( $0 - 0.3 \text{ \AA}^{-1}$ ): (a-c) The fits between the calculated scattering curve from the best ensemble (colored, selected by EOM) and the experimental data (black). (d-f)  $D_{\text{max}}$  distribution of the conformers in the pool (black) and the optimized ensembles (colored). (g) Comparison of the  $D_{\text{max}}$  and (h)  $R_g$  distributions in the optimized ensembles of three IgG subclasses. (i) Representative structural model of IgG1 generated by RanCh.

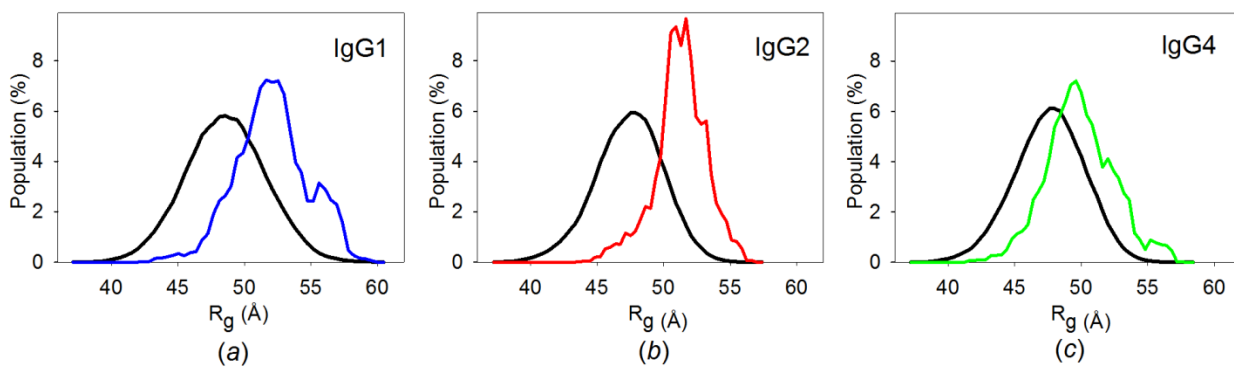

**Figure S5.** Additional results of ensemble optimization using an angular range of 0 - 0.5  $\text{\AA}^{-1}$ , i.e. supplementing Figure 2: (a-c)  $R_g$  distribution of the conformers in the pool (black) and the optimized ensembles (colored) for each IgG.

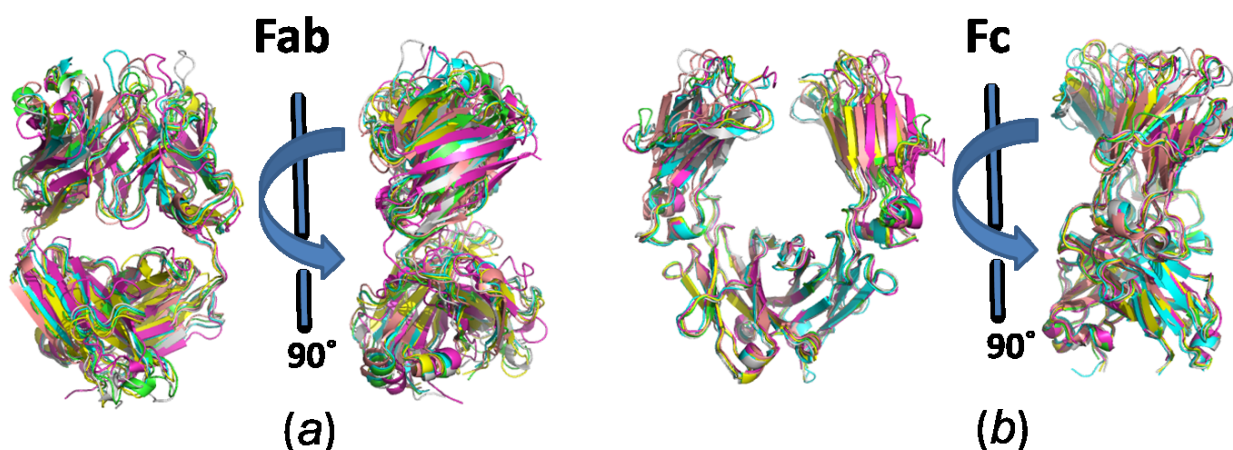

| PDB  | Source | Structure                                                      |
|------|--------|----------------------------------------------------------------|
| 4OGY | hIgG1  | Complex with human plasma kallikrein                           |
| 2VXV | hIgG1  | Fab fragment                                                   |
| 1AE6 | mIgG2a | Fab fragment                                                   |
| 1CLY | hIgG1  | Complex with nonoate methyl ester derivative of Lewis Y (nLey) |
| 2G75 | hIgG1  | Fab fragment                                                   |
| 3W9D | hIgG1  | Fab fragment                                                   |

| PDB  | Source | Structure                                        |
|------|--------|--------------------------------------------------|
| 3D6G | hIgG1  | Complex with Protein-A Mimetic Peptide Dendrimer |
| 1H3X | hIgG1  | Fc fragment                                      |
| 1T89 | hIgG1  | Complex with FcRRIIB                             |
| 1HZH | hIgG1  | Intact IgG molecule                              |
| 4HAG | hIgG2  | Fc fragment                                      |
| 4C54 | hIgG4  | Fc fragment                                      |

**Figure S6.** The crystal structures of Fab (a) and Fc fragments (b). Below the figures list the information of the PDB files, respectively.

**Table S1.** The average  $R_g$  and  $D_{max}$  of the pool and the optimized ensembles.

|                            | <b>IgG1</b> |          | <b>IgG2</b> |          | <b>IgG4</b> |          |
|----------------------------|-------------|----------|-------------|----------|-------------|----------|
|                            | Pool        | Ensemble | Pool        | Ensemble | Pool        | Ensemble |
| $R_g$ (Å) <sup>1</sup>     | 48.6        | 52.0     | 47.4        | 51.3     | 47.6        | 49.9     |
| $D_{max}$ (Å) <sup>2</sup> | 156.9       | 168.1    | 153.9       | 167.8    | 154.8       | 163.2    |

<sup>1</sup>Corresponding to the distributions shown in results in Figure S5(a-c). <sup>2</sup>Corresponding to the distributions shown in results in Figure 2(d-f).

## References

Tian, X., Langkilde, A. E., Thorolfsson, M., Rasmussen, H. B. & Vestergaard, B. (2014). *J. Pharm. Sci.* **103**, 1701-1710.
